# Supplementary material
Source: Springer Nature journal article supplement (https://www.springermedizin.de/resource/supplementary/13584_2013_152_MOESM4_ESM.pdf/9676942)

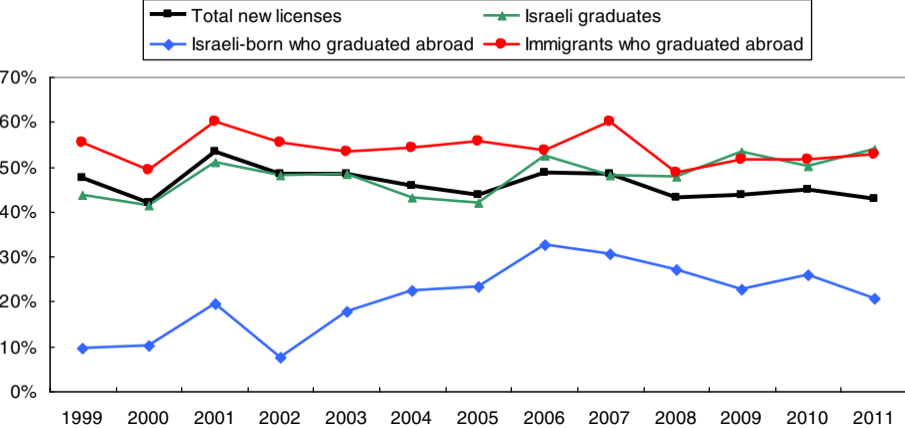

Supplement: MOESM4 [file 9676942]
